# Supplementary material
Source: PubMed Central journal article supplement (PMC6455806)
Supplement: NIHMS1014903-supplement-Additional_Tables.pdf [file NIHMS1014903-supplement-Additional_Tables.pdf]

## **Additional Files**

Additional file 1: A table showing unadjusted and adjusted Cox extended analyses of time to HIV-1 RNA viral load rebound among 564 HIV-positive illicit drug users with non-detectable VL

Additional file 2: A table showing unadjusted and adjusted Cox extended analyses of time to HIV-1 RNA viral load rebound among 564 HIV-positive illicit drug users with non-detectable VL

**Table 3. Unadjusted and adjusted Cox extended analyses of time to HIV-1 RNA viral load rebound among 564 HIV-positive illicit drug users with non-detectable VL**

| Characteristic                          | Unadjusted               |                  | Adjusted                 |                  |
|-----------------------------------------|--------------------------|------------------|--------------------------|------------------|
|                                         | Hazard Ratio<br>(95% CI) | <i>p</i> - value | Hazard Ratio<br>(95% CI) | <i>p</i> - value |
| <b>Age<sup>1</sup></b>                  |                          |                  |                          |                  |
| Per year                                | 0.96 (0.95 – 0.98)       | < 0.001          | 0.97 (0.95 – 0.98)       | < 0.001          |
| <b>Gender<sup>2</sup></b>               |                          |                  |                          |                  |
| (Non-male vs. male)                     | 0.86 (0.63 – 1.19)       | 0.359            |                          |                  |
| <b>Ancestry<sup>2</sup></b>             |                          |                  |                          |                  |
| (white vs. non-white)                   | 0.95 (0.71 – 1.28)       | 0.734            |                          |                  |
| <b>Education<sup>2</sup></b>            |                          |                  |                          |                  |
| (≥ HS dipl. vs. <)                      | 1.34 (1.02 – 1.77)       | 0.039*           |                          |                  |
| <b>Unstable housing<sup>3</sup></b>     |                          |                  |                          |                  |
| (yes vs. no)                            | 1.13 (0.85 – 1.49)       | 0.399            |                          |                  |
| <b>Heroin injection<sup>3</sup></b>     |                          |                  |                          |                  |
| (Any vs. none)                          | 1.40 (1.12 – 1.75)       | 0.003            | 1.38 (1.11 – 1.72)       | 0.004            |
| <b>Cocaine injection<sup>3</sup></b>    |                          |                  |                          |                  |
| (Any vs. none)                          | 1.24 (1.00 – 1.54)       | 0.055            |                          |                  |
| <b>Crystal MA injection<sup>3</sup></b> |                          |                  |                          |                  |
| (Any vs. none)                          | 1.00 (0.75 – 1.33)       | 0.990            |                          |                  |
| <b>Crack cocaine use<sup>3</sup></b>    |                          |                  |                          |                  |
| (Any vs. none)                          | 1.12 (0.90 – 1.39)       | 0.329            |                          |                  |
| <b>Alcohol use<sup>3</sup></b>          |                          |                  |                          |                  |
| (Any vs. none)                          | 1.17 (0.76 – 1.82)       | 0.477            |                          |                  |
| <b>HIV MD experience<sup>2</sup></b>    |                          |                  |                          |                  |
| (<6 vs. ≥ 6 patients)                   | 1.09 (0.77 – 1.55)       | 0.623            |                          |                  |
| <b>CD4<sup>2</sup></b>                  |                          |                  |                          |                  |
| per 100 cells                           | 0.93 (0.85 – 1.01)       | 0.097            | 0.87 (0.82 – 0.94)       | < 0.001          |

1. Based on current status

2. Measured at baseline

3. Time-updated referring to the last six months

4. Antiretroviral therapy (ART)

**Table 4. Unadjusted and adjusted Cox extended analyses of time to HIV-1 RNA viral load rebound among 564 HIV-positive illicit drug users with non-detectable VL**

| Characteristic                               | Unadjusted               |                  | Adjusted                 |                  |
|----------------------------------------------|--------------------------|------------------|--------------------------|------------------|
|                                              | Hazard Ratio<br>(95% CI) | <i>p</i> - value | Hazard Ratio<br>(95% CI) | <i>p</i> - value |
| <b>Age<sup>1</sup></b>                       |                          |                  |                          |                  |
| Per year                                     | 0.96 (0.95 – 0.98)       | < 0.001          | 0.97 (0.96 – 0.99)       | 0.002            |
| <b>Gender<sup>2</sup></b>                    |                          |                  |                          |                  |
| (Non-male vs. male)                          | 0.86 (0.63 – 1.19)       | 0.359            |                          |                  |
| <b>Ancestry<sup>2</sup></b>                  |                          |                  |                          |                  |
| (white vs. non-white)                        | 0.95 (0.71 – 1.28)       | 0.734            |                          |                  |
| <b>Education<sup>2</sup></b>                 |                          |                  |                          |                  |
| (≥ HS dipl. vs. <)                           | 1.34 (1.02 – 1.77)       | 0.039*           |                          |                  |
| <b>Unstable housing<sup>3</sup></b>          |                          |                  |                          |                  |
| (yes vs. no)                                 | 1.13 (0.85 – 1.49)       | 0.399            |                          |                  |
| <b>Heroin injection<sup>3</sup></b>          |                          |                  |                          |                  |
| (≥ daily vs. < daily)                        | 2.23 (1.54 – 3.23)       | <0.001*          | 1.65 (1.16 – 2.36)       | < 0.001          |
| <b>Cocaine injection<sup>3</sup></b>         |                          |                  |                          |                  |
| (≥ daily vs. < daily)                        | 1.73 (1.19 – 2.51)       | 0.004*           | 1.28 (0.91 – 1.81)       | 0.156            |
| <b>Crystal MA injection<sup>3</sup></b>      |                          |                  |                          |                  |
| (≥ daily vs. < daily)                        | 2.34 (1.32 – 4.12)       | 0.004            | 1.18 (0.90 – 1.55)       | 0.231            |
| <b>Crack cocaine use<sup>3</sup></b>         |                          |                  |                          |                  |
| (≥ daily vs. < daily)                        | 1.73 (1.32 – 2.26)       | < 0.001          |                          |                  |
| <b>Heavy alcohol use<sup>3</sup></b>         |                          |                  |                          |                  |
| (Yes vs. no)                                 | 1.90 (1.13 – 3.19)       | 0.015*           |                          |                  |
| <b>HIV MD experience<sup>2</sup></b>         |                          |                  |                          |                  |
| (<6 vs. ≥ 6 patients)                        | 1.09 (0.77 – 1.55)       | 0.623            |                          |                  |
| <b>CD4<sup>2</sup></b>                       |                          |                  |                          |                  |
| per 100 cells                                | 0.93 (0.85 – 1.01)       | 0.097            | 0.93 (0.86 – 1.00)       | 0.061            |
| <b>ART<sup>4</sup> adherence<sup>3</sup></b> |                          |                  |                          |                  |
| < 95 vs. ≥ 95%                               | 0.23 (0.18 – 0.29)       | < 0.001          | 0.24 (0.19 – 0.31)       | < 0.001          |

1. Based on current status

2. Measured at baseline

3. Time-updated referring to the last six months

4. Antiretroviral therapy (ART)
